# Supplementary material for: Level of sedation in critically ill adult patients: a protocol for a systematic review with meta-analysis and trial sequential analysis
Source: HighWire-hosted journal article supplement (doi:10.1136/bmjopen-2022-061806), 2022-09-01
Supplement: bmjopen-2022-061806supp001_data_supplement.pdf [file bmjopen-2022-061806supp001_data_supplement.pdf]

**Supplement table 1.** Table of data that will be extracted from the included trials.

|                                                                                                                                                                                                                                                                                                                                                                                                                                                                                                     |
|-----------------------------------------------------------------------------------------------------------------------------------------------------------------------------------------------------------------------------------------------------------------------------------------------------------------------------------------------------------------------------------------------------------------------------------------------------------------------------------------------------|
| <p><b>Trial characteristics</b></p> <p><i>Bias risks components</i></p> <p><i>Trial design (parallel, factorial or crossover)</i></p> <p><i>Trial period</i></p> <p><i>Number of trial sites</i></p> <p><i>Name of countries in which the trial was conducted</i></p> <p><i>Number of intervention arms</i></p> <p><i>Length of follow-up and</i></p> <p><i>Inclusion and exclusion criteria</i></p>                                                                                                |
| <p><b>Patients' characteristics and diagnosis</b></p> <p><i>Number of randomized participants</i></p> <p><i>Number of analyzed participants</i></p> <p><i>Number of participants lost to follow-up</i></p> <p><i>Mean age</i></p> <p><i>Age range</i></p> <p><i>Sex ratio</i></p> <p><i>Specific inclusion criteria based on the condition of the adult (eg, neurological injury, cardiac arrest, hemodynamically unstable, infection, trauma, respiratory failure, or other organ failure)</i></p> |
| <p><b>Experimental intervention characteristics</b></p> <p><i>Type of sedative drug</i></p> <p><i>Dose of sedation</i></p> <p><i>Duration of sedation</i></p> <p><i>Mode of administration</i></p> <p><i>Routines of sedation interruption and cessation</i></p>                                                                                                                                                                                                                                    |
| <p><b>Control intervention characteristics</b></p> <p><i>Type of control intervention</i></p> <p><i>Dose of intervention</i></p>                                                                                                                                                                                                                                                                                                                                                                    |

|                                                                                                                                                                                       |
|---------------------------------------------------------------------------------------------------------------------------------------------------------------------------------------|
| <i>Duration of intervention</i><br><i>Mode of administration</i><br><i>Defined target sedation depth</i>                                                                              |
| <b>Co-intervention characteristics</b><br><br><i>Type of co-intervention</i><br><i>Dose of co-intervention</i><br><i>Duration of co-intervention</i><br><i>Mode of administration</i> |
| <b>Outcomes</b><br><br><i>Primary and secondary outcomes specified and collected</i><br><i>Time points reported</i><br><i>Differences in planned and reported outcomes</i>            |
| <b>Notes (if available)</b><br><br><i>Type of depth of sedation measuring scales</i><br><i>Funding of the trial and</i><br><i>Notable conflicts of interest of trial authors</i>      |
