# Supplementary material for: Level of sedation in critically ill adult patients: a protocol for a systematic review with meta-analysis and trial sequential analysis
Source: HighWire-hosted journal article supplement (doi:10.1136/bmjopen-2022-061806), 2022-09-01
Supplement: bmjopen-2022-061806supp004_data_supplement.pdf [file bmjopen-2022-061806supp004_data_supplement.pdf]

**[1]Search strategies for  
Level of sedation in critically ill adult patients  
(A Ceric)  
Preliminary searches prepared 21 January 2022**

**Cochrane Central Register of Controlled Trials (latest issue) in the Cochrane Library (in 2022, Issue 1: 3354 hits)**

- #1 MeSH descriptor: [Critical Illness] explode all trees
- #2 MeSH descriptor: [Critical Care] explode all trees
- #3 MeSH descriptor: [Intensive Care Units] explode all trees
- #4 ((critical\* and (care\* or ill\*)) or intensive care or ICU or respirat\* or ventilat\*)
- #5 #1 or #2 or #3 or #4
- #6 MeSH descriptor: [Conscious Sedation] explode all trees
- #7 MeSH descriptor: [Deep Sedation] explode all trees
- #8 MeSH descriptor: [Hypnotics and Sedatives] explode all trees
- #9 MeSH descriptor: [Benzodiazepines] explode all trees
- #10 MeSH descriptor: [Propofol] explode all trees
- #11 MeSH descriptor: [Dexmedetomidine] explode all trees
- #12 (sedati\* or benzodiazepin\* or midazolam or propofol or dexmedetomidin\* or lorazepam)
- #13 #6 or #7 or #8 or #9 or #10 or #11 or #12
- #14 #5 and #13
- #15 (adult\* or aged or elder\* or middle next age\* or old next age):ti,ab
- #16 #14 and #15

**MEDLINE Ovid (1946 to the date of the search) (on 21 January 2022: 3310 hits)**

- 1. exp Critical Illness/
- 2. exp Critical Care/
- 3. exp Intensive Care Units/
- 4. ((critical\* and (care\* or ill\*)) or intensive care or ICU or respirat\* or ventilat\*).mp. [mp=title, abstract, original title, name of substance word, subject heading word, floating sub-heading word, keyword heading word, organism supplementary concept word, protocol supplementary concept word, rare disease supplementary concept word, unique identifier, synonyms]
- 5. 1 or 2 or 3 or 4
- 6. exp Conscious Sedation/
- 7. exp Deep Sedation/
- 8. exp "Hypnotics and Sedatives"/
- 9. exp Benzodiazepines/
- 10. exp Propofol/
- 11. exp Dexmedetomidine/
- 12. (sedati\* or benzodiazepin\* or midazolam or propofol or dexmedetomidin\* or lorazepam).mp. [mp=title, abstract, original title, name of substance word, subject heading word, floating sub-heading word, keyword heading word, organism supplementary concept word, protocol supplementary concept word, rare disease supplementary concept word, unique identifier, synonyms]
- 13. 6 or 7 or 8 or 9 or 10 or 11 or 12
- 14. 5 and 13
- 15. (randomized controlled trial or controlled clinical trial or retracted publication or retraction of publication).pt. or clinical trials as topic.sh. or trial.ti.
- 16. (random\* or blind\* or placebo\*).mp. [mp=title, abstract, original title, name of substance word, subject heading word, floating sub-heading word, keyword heading word, organism supplementary concept word, protocol supplementary concept word, rare disease supplementary concept word, unique identifier, synonyms]
- 17. 14 and (15 or 16)
- 18. limit 17 to ("all adult (19 plus years)" or "young adult (19 to 24 years)" or "adult (19 to 44 years)" or "young adult and adult (19-24 and 19-44)" or "middle age (45 to 64 years)" or "middle aged (45 plus years)" or "all aged (65 and over)" or "aged (80 and over)")

**Embase Ovid (1974 to the date of the search) (on 21 January 2022: 8782 hits)**

- 1. exp critical illness/
- 2. exp critically ill patient/
- 3. exp intensive care/
- 4. exp intensive care unit/

5. ((critical\* and (care\* or ill\*)) or intensive care or ICU or respirat\* or ventilat\*).mp. [mp=title, abstract, heading word, drug trade name, original title, device manufacturer, drug manufacturer, device trade name, keyword heading word, floating subheading word, candidate term word]
6. 1 or 2 or 3 or 4 or 5
7. exp sedation/
8. exp hypnotic sedative agent/
9. exp benzodiazepine derivative/
10. exp propofol/
11. (sedati\* or benzodiazepin\* or midazolam or propofol or dexmedetomidin\* or lorazepam).mp. [mp=title, abstract, heading word, drug trade name, original title, device manufacturer, drug manufacturer, device trade name, keyword heading word, floating subheading word, candidate term word]
12. 7 or 8 or 9 or 10 or 11
13. 6 and 12
14. Randomized controlled trial/ or Controlled clinical trial/ or retracted article/ or (erratum or tombstone).pt. or trial.ti. or yes.nr.
15. (random\* or blind\* or placebo\*).mp. [mp=title, abstract, heading word, drug trade name, original title, device manufacturer, drug manufacturer, device trade name, keyword heading word, floating subheading word, candidate term word]
16. 13 and (14 or 15)
17. limit 16 to (adult <18 to 64 years> or aged <65+ years>)

**LILACS (Bireme; 1982 to the date of the search) (on 21 January 2022: 125 hits)**

((critical\$ and (care\$ or ill\$)) or intensive care or ICU or respirat\$ or ventilat\$) [Words] and (sedati\$ or benzodiazepin\$ or midazolam or propofol or dexmedetomidin\$ or lorazepam) [Words] and (random\$ or blind\$ or placebo\$) [Words]

**Science Citation Index Expanded (1900 to the date of the search) and Conference Proceedings Citation Index – Science (1990 to the date of the search) (Web of Science) (on 21 January 2022: 2037 hits)**

#7 #5 AND #6

#6 TI=(adult\* or aged or elder\* or middle next age\* or old next age) or AB=(adult\* or aged or elder\* or middle next age\* or old next age)

#5 #3 AND #4

#4 TI=(random\* or blind\* or placebo\* or meta-analys\* or trial\*) OR TS=(random\* or blind\* or placebo\* or meta-analys\*)

#3 #2 AND #1

#2 TS=(sedati\* or benzodiazepin\* or midazolam or propofol or dexmedetomidin\* or lorazepam)

#1 TS=((critical\* and (care\* or ill\*)) or intensive care or ICU or respirat\* or ventilat\*)

1. Higgins JPT TJ, Chandler J.: **Cochrane Handbook for systematic reviews of interventions version 6.1.** *Cochrane* 2020.
