# Supplementary material for: Level of sedation in critically ill adult patients: a protocol for a systematic review with meta-analysis and trial sequential analysis
Source: HighWire-hosted journal article supplement (doi:10.1136/bmjopen-2022-061806), 2022-09-01
Supplement: bmjopen-2022-061806supp005_data_supplement.pdf [file bmjopen-2022-061806supp005_data_supplement.pdf]

**Supplement material*****Bias arising from the randomization process***

This domain encompasses allocation sequence generation and concealment as well as baseline differences between the trial arms.

**Low risk of bias**

Allocation was adequately concealed, AND there are no baseline imbalances across intervention groups at baseline appear to be compatible with chance, AND an adequate (random or otherwise unpredictable) method was used to generate allocation sequence, OR there is no information about the method used to generate the allocation sequence

**Some concerns**

Allocation was adequately concealed, AND there is a problem with the method of sequence generation, OR baseline imbalances suggest a problem with the randomization process, OR no information is provided about concealment of allocation, AND baseline imbalances across intervention groups appear to be compatible with chance, OR no information to answer any of the signaling questions

**High risk of bias**

Allocation sequence was not concealed, OR no information is provided about concealment of allocation sequence, AND baseline imbalances suggest a problem with the randomization process.

***Bias due to deviation from intended interventions*****Low risk of bias**

Participants, treatment providers, and study personnel were unaware of intervention groups during the trial, OR participants, treating providers, or personnel were aware of intervention groups during the trial but any deviations from intended intervention reflected usual practice, OR participants, treating providers or personnel were aware of intervention groups during the trial but any deviations from intended intervention were unlikely to impact on the

outcome, AND no participants were analyzed in the wrong intervention groups (that is, on the basis of intervention actually received rather than of randomized allocation).

**Some concerns**

Participants, treatment providers, or study personnel were aware of intervention groups and there is no information on whether there were deviations from usual practice that were likely to impact on the outcome and were imbalanced between intervention groups, OR some participants were analyzed in the wrong intervention groups (on the basis of intervention actually received rather than of randomized allocation) but there was little potential for a substantial impact on the estimated effect of intervention.

**High risk of bias**

Participants, carers, or personnel were aware of intervention groups, and there were deviations from intended interventions that were unbalanced between the intervention groups and likely to have affected the outcome, OR some participants were analyzed in the wrong intervention groups (on the basis of intervention actually received rather than of randomized allocation), and there was potential for a substantial impact on the estimated effect of intervention.

***Bias due to missing outcome data*****Low risk of bias**

No missing data OR non-differential missing data (similar proportion of and similar reasons for missing data in compared groups) OR evidence of robustness of effect estimate to missing data (based on adequate statistical methods for handling missing data and sensitivity analysis)

**Some concerns**

An unclear degree of missing data or unclear information on proportion and reasons for missingness in compared groups AND there is no evidence that the effect estimate is robust to missing data.

**High risk of bias**

A high degree of missing data AND differential missing data (different proportion of or different reasons for missing data in compared groups) AND there is no evidence that the effect estimate is robust to missing data.

### ***Bias in measurement of outcomes***

#### **Low risk of bias**

The outcome assessors were unaware of the intervention received by study participants, OR the outcome assessors were aware of the intervention received by study participants, but the assessment of the outcome was unlikely to be influenced by knowledge of the intervention received.

#### **Some concerns**

There is no information available to determine whether the assessment of the outcome is likely to be influenced by knowledge of the intervention received.

#### **High risk of bias**

The assessment of the outcome was likely to be influenced by knowledge of the intervention received by study participants. Bias arising from selective reporting of results.

### **Bias arising from selective reporting of results**

#### **Low risk of bias**

Reported outcome data are unlikely to have been selected, based on the results, from multiple outcome measurements (e.g., scales, definitions, time points) within the outcome domain, and reported outcome data are unlikely to have been selected, based on the results, from multiple analyses of the data.

#### **Some concerns**

There is insufficient information available to exclude the possibility that reported outcome data were selected, based on the results, from multiple outcome measures (e.g., scales, definitions, time points) within the outcome domain, or from multiple analyses of the data. Given that analysis intentions are often unavailable or not reported with sufficient detail, we anticipate that this will be the default judgment for most trials.

**High risk of bias**

Reported outcome data are likely to have been selected, based on the results, from multiple outcome measurements (e.g., scales, definitions, time points) within the outcome domain, or from multiple analyses of the data (or both).

***Overall assessment of risk of bias*****Low risk of bias**

The study is judged to be at low risk of bias for all domains for this result.

**High risk of bias**

The study is judged to be at high risk of bias or to be at some concerns in at least one domain for this result. Our subgroup analysis will compare the intervention effect of trials at low risk of bias with trials at high risk of bias, that is one or more domains at some concern or high risk of bias. We will assess the domains “missing outcome data”, “risk of bias in measurement of the outcome”, and “risk of bias in selection of the reported result” for each outcome result. Thus, we can assess the bias risk for each outcome assessed in addition to each trial. Our primary conclusions will be based on the results of our primary outcome results with overall low risk of bias. Both our primary and secondary conclusions will be presented in the summary of findings tables.
